# Supplementary material for: Change in the Recurrence Pattern and Predictors over Time after Complete Cure of Hepatocellular Carcinoma
Source: PubMed Central journal article supplement — Gut Liver. 2020 Aug 26;15(3):420–9. doi: 10.5009/gnl20101 (PMC8129665; doi:10.5009/gnl20101), 2020-08-26
Supplement: gnl-15-3-420_Supple.pdf [file gnl-15-3-420_Supple.pdf]

**Supplementary Table 1.** Univariate Analysis for Predictors of HCC Recurrence at Each Time Point

| Variable (rating)                                      | At the time of resection or RFA |         | At 1 year after resection or RFA |         | At 2 years after resection or RFA |         | At 3 years after resection or RFA |         | At 4 years after resection or RFA |         | At 5 years after resection or RFA |         |
|--------------------------------------------------------|---------------------------------|---------|----------------------------------|---------|-----------------------------------|---------|-----------------------------------|---------|-----------------------------------|---------|-----------------------------------|---------|
|                                                        | HR [95% CI]                     | p-value | HR [95% CI]                      | p-value | HR [95% CI]                       | p-value | HR [95% CI]                       | p-value | HR [95% CI]                       | p-value | HR [95% CI]                       | p-value |
| Age (years)                                            | 1.012<br>(1.004-1.019)          | 0.002   | 1.014<br>(1.005-1.023)           | 0.002   | 1.017<br>(1.005-1.029)            | 0.006   | 1.024<br>(1.008-1.041)            | 0.004   | 1.026<br>(1.004-1.049)            | 0.021   | 1.037<br>(1.005-1.071)            | 0.025   |
| Gender<br>(0=female; 1=male)                           | 1.035<br>(0.867-1.236)          | 0.701   | 1.088<br>(0.878-1.348)           | 0.440   | 0.943<br>(0.720-1.236)            | 0.672   | 0.862<br>(0.605-1.228)            | 0.412   | 0.793<br>(0.503-1.251)            | 0.319   | 0.786<br>(0.411-1.503)            | 0.467   |
| Etiology<br>(1=HBV; 2=other)                           | 1.218<br>(1.021-1.453)          | 0.028   | 1.247<br>(1.007-1.544)           | 0.043   | 1.275<br>(0.956-1.700)            | 0.099   | 1.325<br>(0.893-1.964)            | 0.162   | 1.476<br>(0.880-2.477)            | 0.140   | 1.721<br>(0.826-3.583)            | 0.147   |
| Liver cirrhosis<br>(0=no; 1=yes)                       | 2.579<br>(2.160-3.079)          | <0.001  | 3.077<br>(2.474-3.827)           | <0.001  | 3.728<br>(2.775-5.010)            | <0.001  | 4.056<br>(2.737-6.012)            | <0.001  | 3.516<br>(2.157-5.732)            | <0.001  | 4.373<br>(2.102-9.098)            | <0.001  |
| Type of treatment<br>(1=resection; 2=RFA)              | 2.123<br>(1.827-2.467)          | <0.001  | 2.465<br>(2.060-2.949)           | <0.001  | 2.633<br>(2.079-3.334)            | <0.001  | 2.866<br>(2.090-3.929)            | <0.001  | 2.463<br>(1.616-3.756)            | <0.001  | 2.327<br>(1.268-4.271)            | 0.006   |
| No. of tumors<br>(1=single; 2=multiple)                | 1.744<br>(1.468-2.072)          | <0.001  | 1.654<br>(1.318-2.076)           | <0.001  | 1.878<br>(1.403-2.514)            | <0.001  | 1.882<br>(1.245-2.845)            | 0.003   | 1.631<br>(0.880-3.021)            | 0.120   | 1.295<br>(0.479-3.504)            | 0.611   |
| Size of maximal tumor<br>(1= $\leq$ 3 cm; 2= $>$ 3 cm) | 1.011<br>(0.970-1.055)          | 0.599   | 0.965<br>(0.912-1.020)           | 0.206   | 0.905<br>(0.835-0.982)            | 0.017   | 0.835<br>(0.741-0.941)            | 0.003   | 0.835<br>(0.715-0.976)            | 0.024   | 0.751<br>(0.584-0.965)            | 0.025   |
| MELD score (score)                                     | 1.116<br>(1.088-1.145)          | <0.001  | 1.188<br>(1.129-1.188)           | <0.001  | 1.240<br>(1.154-1.333)            | <0.001  | 1.207<br>(1.083-1.345)            | 0.001   | 1.049<br>(0.913-1.205)            | 0.502   | 1.190<br>(1.021-1.387)            | 0.026   |

HCC, hepatocellular carcinoma; RFA, radiofrequency ablation; HR, hazard ratio; CI, confidence interval; HBV, hepatitis B virus; MELD, Model for End-Stage Liver Disease.
